# Supplementary material for: Environment-Dependent Variation in Gut Microbiota of an Oviparous Lizard (Calotes versicolor)
Source: MDPI journal article supplement (doi:10.3390/ani11082461), 2021-08-21
Supplement: s1 [file s1]

## Supplementary Materials

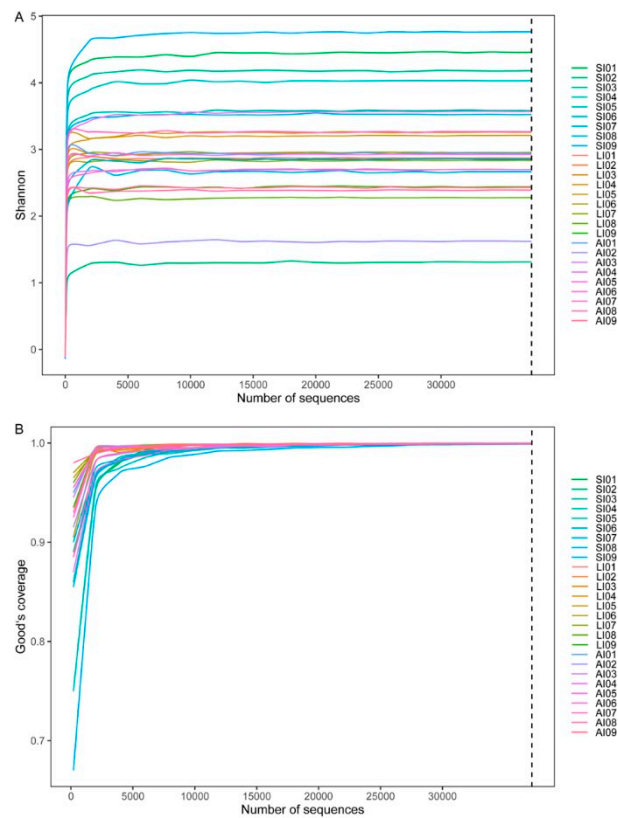

**Figure S1.** Alpha diversity index curve. Shannon index curve (A) and Good's coverage index curve (B).

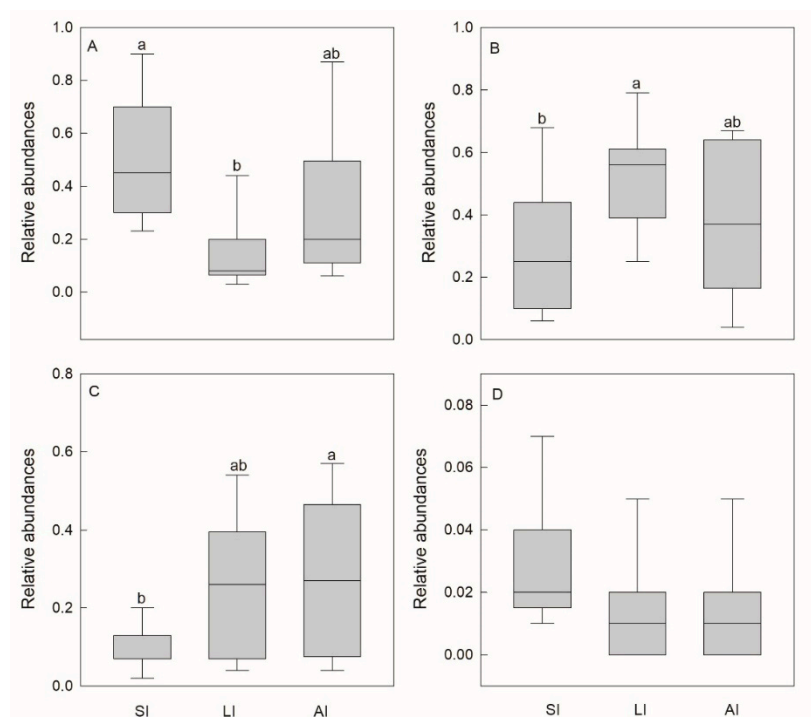

**Figure S2.** The relative abundance of phylum among three groups, *Proteobacteria* (A), *Firmicutes* (B), *Bacteroidetes* (C) and *Actinobacteria* (D). SI: sample from small intestine, LI: sample from large intestine, and AI: sample from large intestine when individuals are free-living.
